# Supplementary material for: Computational screening of a single transition metal atom supported on the C2N monolayer for electrochemical ammonia synthesis
Source: Royal Society of Chemistry journal article supplement (doi:10.1039/c8cp01215f), 2018-01-01
Supplement: c8cp01215f1.pdf [file c8cp01215f1.pdf]

## Supporting Information

### **Computational Screening of Single Transition Metal Atom Supported on C<sub>2</sub>N Monolayer for Electrochemical Ammonia Synthesis**

Zhongxu Wang,<sup>†</sup> Zhigang Yu<sup>‡</sup>, Jingxiang Zhao,<sup>\*†</sup>

<sup>†</sup>College of Chemistry and Chemical Engineering, Key Laboratory of Photonic and Electronic Bandgap Materials, Ministry of Education, Harbin Normal University, Harbin, 150025, China

<sup>‡</sup> School of Chemistry and Chemical Engineering, Yangtze Normal University, Fuling, Chongqing, 408100, China.

\* To whom correspondence should be addressed. Email: xjz\_hmily@163.com (JZ)

**Table S1.** The computed adsorption energy ( $E_{\text{ads}}$ , eV), distance ( $d$ , Å), and charge transfer ( $Q$ ,  $|e|$ ) of  $\text{N}_2$  adsorption on various  $\text{TM}@\text{C}_2\text{N}$  monolayers.

| $\text{TM}@\text{C}_2\text{N}$ | $E_{\text{ads}}$ | $d_{\text{TM-N}}$ | $d_{\text{N-N}}$ |
|--------------------------------|------------------|-------------------|------------------|
| Sc                             | -0.56            | 2.23              | 1.12             |
| Ti                             | -0.89            | 2.04              | 1.12             |
| V                              | -0.96            | 2.00              | 1.12             |
| Cr                             | -0.29            | 1.87              | 1.13             |
| Mn                             | -0.46            | 2.18              | 1.11             |
| Fe                             | -1.00            | 1.91              | 1.12             |
| Co                             | -0.93            | 1.85              | 1.12             |
| Ni                             | -0.75            | 1.87              | 1.12             |
| Cu                             | -0.79            | 1.85              | 1.12             |
| Zn                             | -0.51            | 2.11              | 1.11             |
| Ru                             | -0.93            | 1.92              | 1.13             |
| Rh                             | -0.58            | 2.02              | 1.12             |
| Pd                             | -0.29            | 2.11              | 1.11             |
| Ag                             | -0.18            | 2.74              | 1.11             |
| Mo                             | -1.05            | 1.96              | 1.14             |

**Table S2.** (a) The computed total electronic energies (E, a.u.) of TM@C<sub>2</sub>N by considering different formal spin moments ( $\mu_f$ ,  $\mu_B$ ) and the adopted energies in the present work.

|                     | High Spin (E/ $\mu$ ) | Low Spin (E/ $\mu$ ) | Adopted Energies |
|---------------------|-----------------------|----------------------|------------------|
| V@C <sub>2</sub> N  | -3227.193954/3        | -3227.192924/1       | -3227.193954     |
| Cr@C <sub>2</sub> N | -3244.306176/4        | -3244.305082/0       | -3244.306176     |
| Mn@C <sub>2</sub> N | -3262.864136/5        | -3262.864136/1       | -3262.864136     |
| Fe@C <sub>2</sub> N | -3284.264700/4        | -3284.260108/0       | -3284.264700     |
| Co@C <sub>2</sub> N | -3307.865108/3        | -3307.865108/1       | -3307.865108     |
| Ni@C <sub>2</sub> N | -3334.535923/2        | -3334.523759/0       | -3334.535923     |
| Mo@C <sub>2</sub> N | -3236.526167/4        | -3236.500334/0       | -3236.526167     |
| Ru@C <sub>2</sub> N | -3266.966990/4        | -3266.964720/0       | -3266.966990     |
| Pd@C <sub>2</sub> N | -3304.368651/2        | -3304.364825/0       | -3304.368651     |

(b) The computed total electronic energies (E, a.u.) of various NRR species on Mo@C<sub>2</sub>N by considering different formal spin moments ( $\mu_f$ ,  $\mu_B$ ) and the adopted energies in the present work.

|                                               | High Spin (E/ $\mu$ ) | Low Spin (E/ $\mu$ ) | Adopted Energies |
|-----------------------------------------------|-----------------------|----------------------|------------------|
| N <sub>2</sub> <sup>*</sup>                   | -3346.014752/4        | -3346.009458/0       | -3346.014752     |
| N <sub>2</sub> H <sup>*</sup>                 | -3346.587326/4        | -3346.581729/0       | -3346.587326     |
| N-NH <sub>2</sub> <sup>*</sup>                | -3347.194220/4        | -3347.188472/0       | -3347.194220     |
| NH-NH <sup>*</sup>                            | -3347.169023/4        | -3347.161458/0       | -3347.169023     |
| N <sup>*</sup>                                | -3291.277093/4        | -3291.273171/0       | -3291.277093     |
| NH-NH <sub>2</sub> <sup>*</sup>               | -3347.788147/4        | -3347.782180/0       | -3347.788147     |
| NH <sup>*</sup>                               | -3291.871334/4        | -3291.870881/0       | -3291.871334     |
| NH <sub>2</sub> -NH <sub>2</sub> <sup>*</sup> | -3348.391497/4        | -3348.381691/0       | -3348.391497     |
| NH <sub>2</sub> <sup>*</sup>                  | -3292.4831139/4       | -3292.481093/0       | -3292.4831139    |

**Table S3.** The computed charge transfer ( $Q$ ,  $|e|$ ), magnetic moment ( $\mu$ ,  $\mu_B$ ), distance ( $d$ , Å), and binding energy ( $E_{\text{binding}}$ , eV) of various single TM atoms on C<sub>2</sub>N monolayer.

| Atom | $Q$  | $\mu_{\text{tot}}/\mu_{\text{TM}}$ | $d_{\text{TM-N}}$ | $E_{\text{binding}}$ |
|------|------|------------------------------------|-------------------|----------------------|
| Sc   | 0.93 | 0.00/0.00                          | 2.28              | -7.85                |
| Ti   | 0.75 | 1.22/1.58                          | 2.23              | -7.17                |
| V    | 0.57 | 2.84/3.00                          | 2.11              | -6.20                |
| Cr   | 0.68 | 3.47/3.85                          | 2.09              | -4.83                |
| Mn   | 0.66 | 4.58/4.67                          | 2.24              | -4.74                |
| Fe   | 0.49 | 3.40/3.42                          | 2.15              | -4.63                |
| Co   | 0.38 | 1.81/1.89                          | 2.00              | -4.31                |
| Ni   | 0.29 | 1.08/1.19                          | 1.98              | -4.47                |
| Cu   | 0.40 | 0.00/0.00                          | 2.09              | -3.39                |
| Zn   | 0.68 | 0.00/0.00                          | 2.09              | -1.58                |
| Mo   | 0.65 | 2.94/3.36                          | 2.15              | -5.42                |
| Rh   | 0.27 | 0.00/0.00                          | 2.00              | -4.68                |
| Ru   | 0.41 | 1.12/1.18                          | 2.02              | -5.56                |
| Pd   | 0.40 | 0.76/1.02                          | 2.20              | -3.28                |
| Ag   | 0.34 | 0.00/0.00                          | 2.77              | -3.12                |

**Table S4.** The computed magnetic moment ( $\mu$ ,  $\mu_B$ ) of various NRR intermediates adsorbed on Mo@C<sub>2</sub>N monolayer.

|                                    | Total spin moment | Spin moment on Mo | Spin moment on NRR species |
|------------------------------------|-------------------|-------------------|----------------------------|
| N <sub>2</sub> *                   | 1.09              | 0.98              | 0.10                       |
| N <sub>2</sub> H*                  | 0.98              | 0.95              | -0.12                      |
| N-NH <sub>2</sub> *                | 1.09              | 1.01              | -0.07                      |
| NH-NH*                             | 1.39              | 1.13              | -0.07                      |
| N*                                 | 0.87              | 0.86              | -0.09                      |
| NH-NH <sub>2</sub> *               | 1.26              | 1.15              | -0.15                      |
| NH <sub>2</sub> -NH <sub>2</sub> * | 0.92              | 0.66              | -0.11                      |
| NH*                                | 0.00              | 0.00              | 0.00                       |
| NH <sub>2</sub> *                  | 1.43              | 1.27              | -0.05                      |
